# Supplementary material for: PagMYB205 Negatively Affects Poplar Salt Tolerance through Reactive Oxygen Species Scavenging and Root Vitality Modulation
Source: MDPI journal article supplement (doi:10.3390/ijms242015437), 2023-10-22
Supplement: s1 [file s1]

**Table S1** Physicochemical properties of PagMYB205

| Genes     | Molecular Weight (Da) | Total number of atoms | Amino Acids | Physicochemical properties |           |                |                   |                 |                                         |                         |
|-----------|-----------------------|-----------------------|-------------|----------------------------|-----------|----------------|-------------------|-----------------|-----------------------------------------|-------------------------|
|           |                       |                       |             | Asp + Gl                   | Arg + Lys | Theoretical pI | Instability index | Aliphatic index | Grand average of hydropathicity (GRAVY) | Estimated half-life (h) |
| PagMYB205 | 34166.32              | 4743                  | 301         | 36                         | 43        | 8.73           | 61.28             | 64.85           | -0.839                                  | 30                      |

**Table S2** PagMYB205 encodes the amino acid composition of the protein

| Amino acid composition | PagMYB205 |        | Amino acid composition | PagMYB205 |         |
|------------------------|-----------|--------|------------------------|-----------|---------|
| Ala (A)                | 13        | (4.3%) | Phe (F)                | 5         | (1.7%)  |
| Arg (R)                | 20        | (6.6%) | Pro (P)                | 13        | (4.3%)  |
| Asn (N)                | 16        | (5.3%) | Ser (S)                | 33        | (11.0%) |
| Asp (D)                | 13        | (4.3%) | Thr (T)                | 30        | (10.0%) |
| Cys (C)                | 13        | (4.3%) | Trp (W)                | 8         | (2.7%)  |
| Gln (Q)                | 12        | (4.0%) | Tyr (Y)                | 7         | (2.3%)  |
| Glu (E)                | 23        | (7.6%) | Val (V)                | 5         | (1.7%)  |
| Gly (G)                | 15        | (5.0%) | Pyl (O)                | 0         | (0.0%)  |
| His (H)                | 8         | (2.7%) | Sec (U)                | 0         | (0.0%)  |
| Ile (I)                | 16        | (5.3%) | Asx( B)                | 0         | (0.0%)  |
| Leu (L)                | 27        | (9.0%) | Glx( Z)                | 0         | (0.0%)  |
| Lys (K)                | 23        | (7.6%) | Xaa( X)                | 0         | (0.0%)  |
| Met (M)                | 1         | (0.3%) |                        |           |         |

**Table S3** Cis-element of *PagMYB205*

| Site Name          | Function                                                            | Number |
|--------------------|---------------------------------------------------------------------|--------|
| I-box              | part of a light responsive element                                  | 1      |
| MRE                | MYB binding site involved in light responsiveness                   | 1      |
| TGACG-motif        | cis-acting regulatory element involved in the MeJA-responsiveness   | 3      |
| ARE                | cis-acting regulatory element essential for the anaerobic induction | 2      |
| Box 4              | part of a conserved DNA module involved in light responsiveness     | 2      |
| CGTCA-motif        | cis-acting regulatory element involved in the MeJA-responsiveness   | 3      |
| TCCC-motif         | part of a light responsive element                                  | 1      |
| G-Box              | cis-acting regulatory element involved in light responsiveness      | 3      |
| ABRE               | cis-acting element involved in the abscisic acid responsiveness     | 2      |
| 3-AF1 binding site | light responsive element                                            | 1      |

|            |                                                                    |   |
|------------|--------------------------------------------------------------------|---|
| RY-element | cis-acting regulatory element involved in seed-specific regulation | 3 |
| Gap-box    | part of a light responsive element                                 | 1 |
| GT1-motif  | light responsive element                                           | 1 |

**Table S4** Primer sequences

| Name                  | Primers (5'→3')                           | Length |
|-----------------------|-------------------------------------------|--------|
| PF                    | AGAAGACGTTCCAACCACG                       | 19 bp  |
| PR                    | CGGTAAGGATCTGAGCTACAC                     | 21bp   |
| CAM-RNAi-PagMYB205-F1 | ATTTGGAGAGGACACGCTCGAGATTGACCCACAAACACACA | 41bp   |
| CAM-RNAi-PagMYB205-R1 | ACCAAGCTGGGGTACCGAATTCCTCTCCCTCTTTTGTGT   | 41bp   |
| CAM-RNAi-PagMYB205-F2 | TGGGTTCGAAATCGATAAGCTTACTCTCCCTCTTTTGTGT  | 41bp   |
| CAM-RNAi-PagMYB205-R2 | CTCATTAAGCAGGACTCTAGAATTGACCCACAAACACACA  | 41bp   |
| pBI121-PagMYB205-F    | ATGGGTCGCTCACCTTGTTGCG                    | 19bp   |
| pBI121-PagMYB205-R    | GATTACAGGGTCAGGTGAAG                      | 21bp   |
| pBI121-F              | CCATCGTTGAAGATGCCTCTGC                    | 22bp   |
| pBI121-R              | CTCTTCGCTATTACGCCAGCTG                    | 22bp   |
| PagMYB205-BD-F        | CCGGAATTCATGGGTCGCTCACCTTGTTG             | 29bp   |
| PagMYB205-BD-R        | ACGCGTCGACCCAACAATAATATCTACGGCTC          | 32bp   |
| pGBKT7-F              | TCATCGAAGAGAGTAGT                         | 17bp   |
| pGBKT7-R              | GAGTCACTTTAAAATTTGTATA                    | 22bp   |
| PagMYB205-F           | CCGCCACAACCACCGCTACTTC                    | 22 bp  |
| PagMYB205-R           | CTTCAAGAGAAGCGGTCTC                       | 19bp   |
| Actin-F               | ACCCTCCAATCCAGACACTG                      | 20 bp  |
| Actin-R               | TTGCTGACCGTATGAGCAAG                      | 20 bp  |
