# Supplementary material for: PagMYB205 Negatively Affects Poplar Salt Tolerance through Reactive Oxygen Species Scavenging and Root Vitality Modulation
Source: MDPI journal article supplement (doi:10.3390/ijms242015437), 2023-10-22
Supplement: s1 [file s1]

blue line represents the  $\alpha$ -helix, the red line represents the extended segment, the green line represents the  $\beta$ -angle, and the purple line represents the irregular curl.

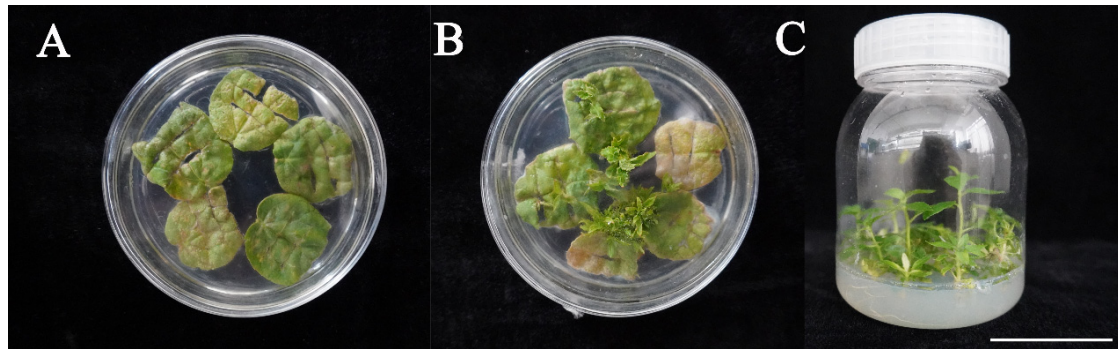

**Figure S3** Cultivation of PagMYB205 transgenic poplar. **(A)** Infected 84K poplar leaves were cultured on selective medium. **(B)** The leaves with resistant buds grew on the selective medium. **(C)** Resistant buds grew on selective rooting medium. bar:5cm.

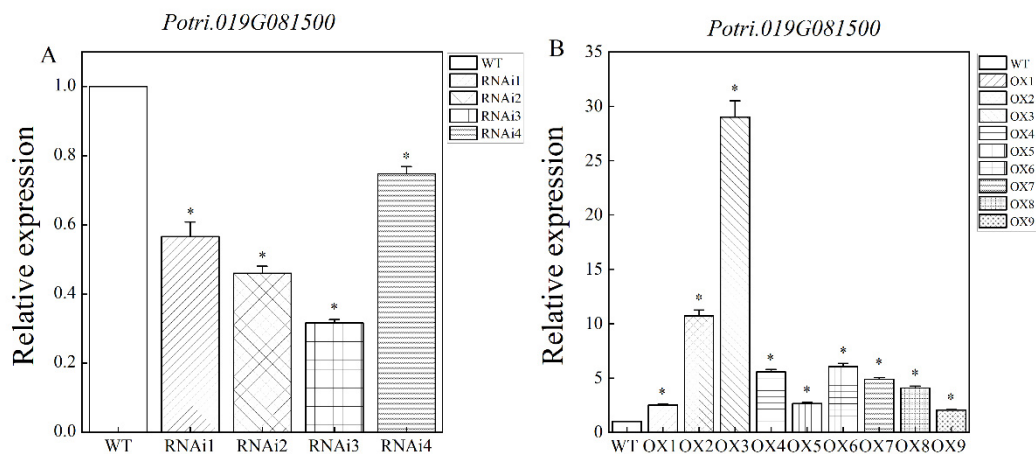

**Figure S4** RT-qPCR identification of transgenic poplar. **(A)** Different lines of RNAi-PagMYB205 transgenic poplar. **(B)** Different lines of pBI121-PagMYB205 transgenic poplar. \* indicate significant differences among lines ( $p < 0.05$ ).

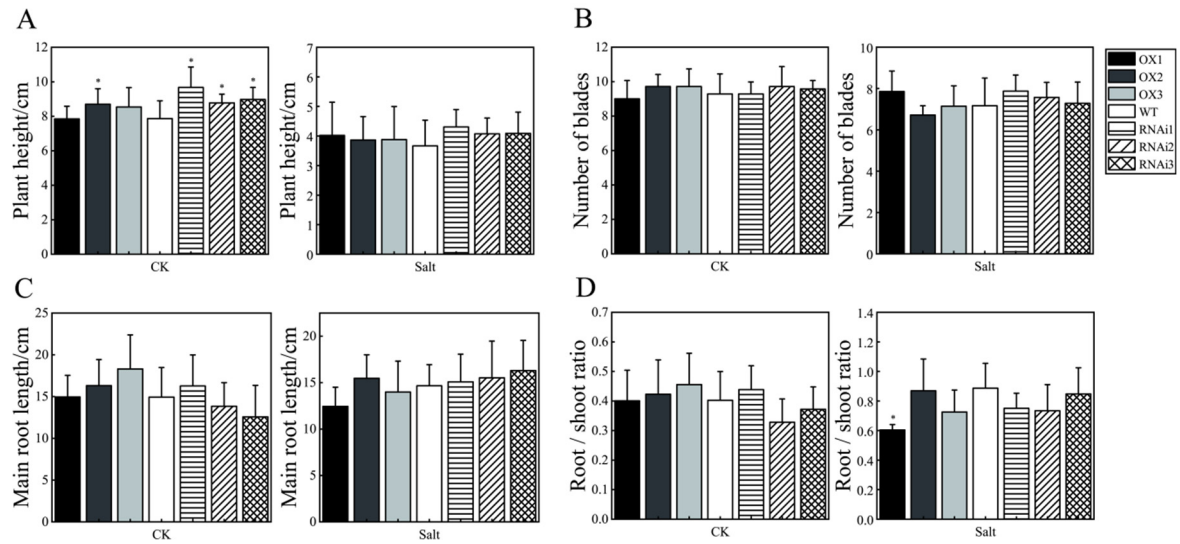

**Figure S5** The morphological indexes of PagMYB205 transgenic poplar and non-transgenic poplar under salt treatment and non-salt treatment conditions. (A) Plant height. (B) Number of blades. (C) Main root length. (D) Root-shoot ratio. \* indicate significant differences among lines ( $p < 0.05$ ). CK: normal conditions; Salt: Salt treatment conditions.

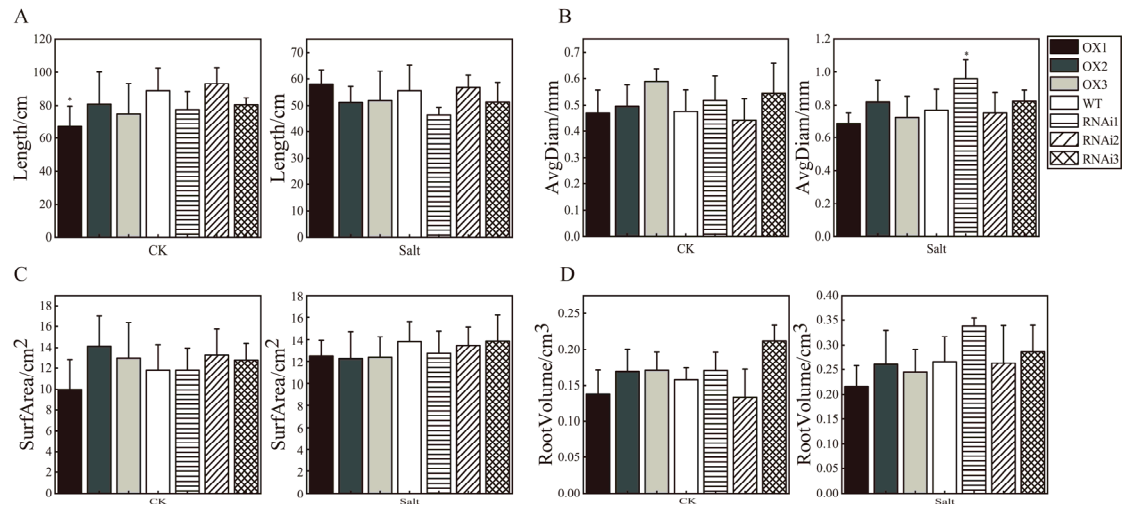

**Figure S6** Root morphological data of PagMYB205 transgenic poplar and non-transgenic poplar under salt and non-salt treatment conditions. (A) Length. (B) AvgDiam. (C) SurfArea. (D) Root Volume. \* indicate significant differences among lines ( $p < 0.05$ ). CK: normal conditions; Salt: Salt treatment conditions.

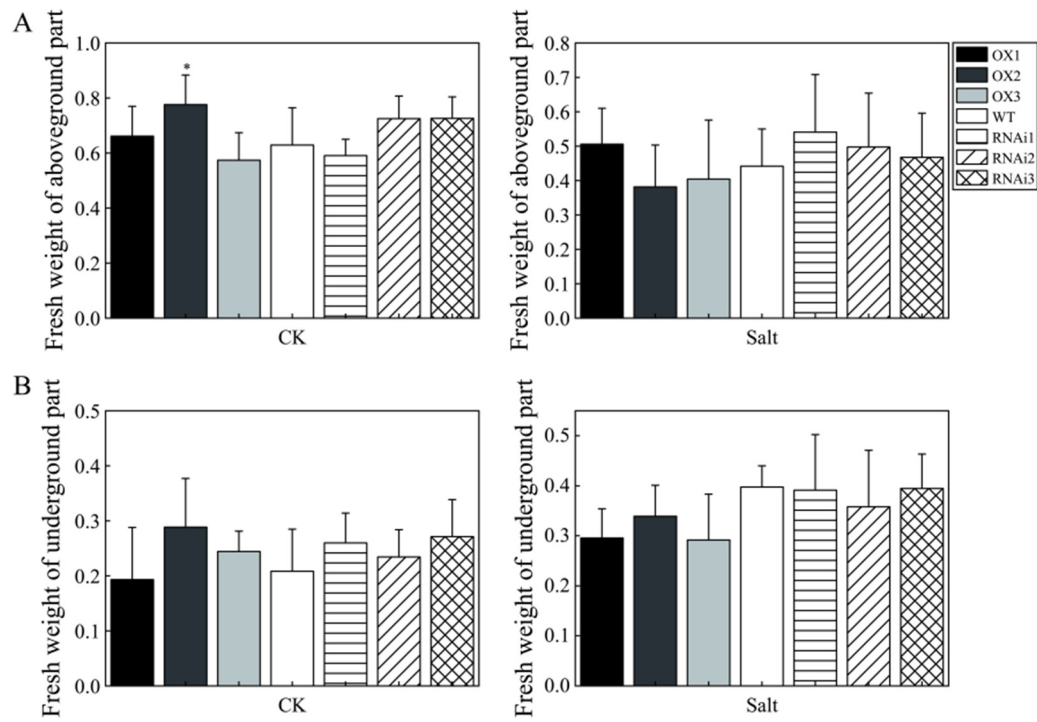

**Figure S7** Fresh weight of PagMYB205 transgenic poplar and non-transgenic poplar under salt treatment and non-salt treatment conditions. **(A)** Fresh weight of aboveground part. **(B)** Fresh weight of underground part. \* indicate significant differences among lines ( $p < 0.05$ ). CK: normal conditions; Salt: Salt treatment conditions.
